# Supplementary material for: Lanthanide-doped KYb3F10 crystals: controllable phases, rich morphologies and Tb3+/Eu3+ down-conversion emission
Source: Royal Society of Chemistry journal article supplement (doi:10.1039/c9ce00420c), 2019-01-01
Supplement: c9ce00420c1.pdf [file c9ce00420c1.pdf]

## Lanthanide-doped $\text{KYb}_3\text{F}_{10}$ crystals: controllable phases, rich morphologies and $\text{Tb}^{3+}/\text{Eu}^{3+}$ down-conversion emission

Wenpeng Xia,<sup>#a</sup> Jie Xiong,<sup>#a</sup> Li Jiang,<sup>a</sup> Rui Ye,<sup>a</sup> Yini Mao,<sup>a</sup> Shanshan Hu<sup>a</sup> and Jun Yang<sup>\*a</sup>

<sup>a</sup> School of Chemistry and Chemical Engineering, Southwest University, No. 2 Tiansheng Road, Beibei District, Chongqing 400715, China.

<sup>#</sup> These authors contributed equally to this work.

\* Corresponding author. E-mail: [jyang@swu.edu.cn](mailto:jyang@swu.edu.cn)

**Table S1** Crystallographic data for  $\text{KYb}_3\text{F}_{10}$ .

|                                      |                             |
|--------------------------------------|-----------------------------|
| Formula                              | $\text{KYb}_3\text{F}_{10}$ |
| Crystal system                       | Cubic                       |
| Space group                          | F m-3m(225)                 |
| a/Å                                  | 11.431(6)                   |
| b/Å                                  | 11.431(6)                   |
| c/Å                                  | 11.431(6)                   |
| $\alpha /^\circ$                     | 90                          |
| $\beta /^\circ$                      | 90                          |
| $\gamma /^\circ$                     | 90                          |
| V/Å <sup>3</sup>                     | 1493.66(136)                |
| Z                                    | 8                           |
| $\rho_{\text{calc}}/\text{gcm}^{-3}$ | 6.653                       |

**Table S2** The length and diameter of the samples from the SEM images in Fig. 7.

|                  | Length ( $\mu\text{m}$ ) | Wide ( $\mu\text{m}$ ) |
|------------------|--------------------------|------------------------|
| No doping        | 3.9                      | 3.8                    |
| $\text{Er}^{3+}$ | 2.6                      | 2.2                    |
| $\text{Ho}^{3+}$ | 2.2                      | 1.4                    |
| $\text{Tb}^{3+}$ | 2.4                      | 1.6                    |
| $\text{Gd}^{3+}$ | 1.7                      | 1.5                    |
| $\text{Eu}^{3+}$ | 1.8                      | 0.1                    |
| $\text{Sm}^{3+}$ | 0.5                      | 0.4                    |
| $\text{Ce}^{3+}$ | 0.4                      | 0.3                    |
| $\text{La}^{3+}$ | 0.2                      | 0.2                    |

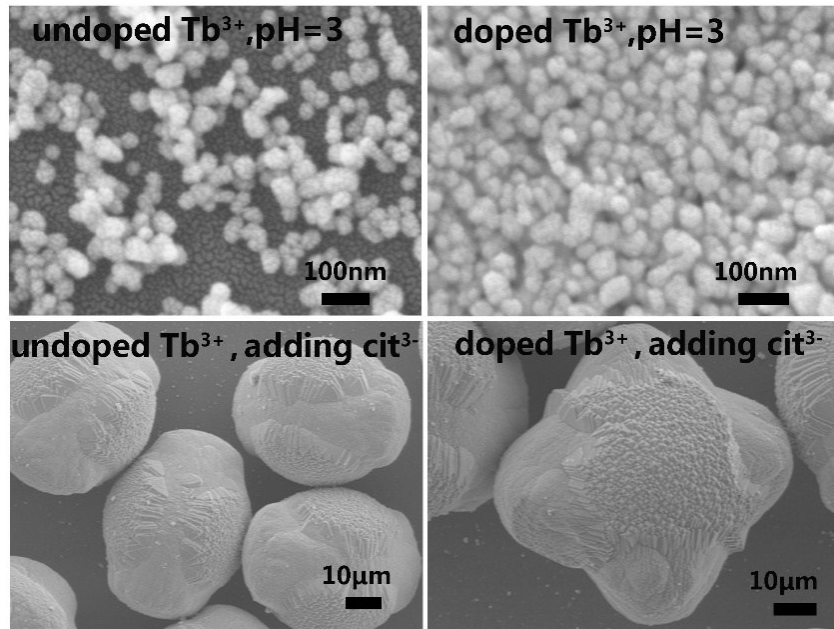

**Figure S1** SEM images of the  $KYb_3F_{10}$  and  $KYb_{2.97}F_{10}:0.03Tb^{3+}$  crystals under the same reaction conditions.

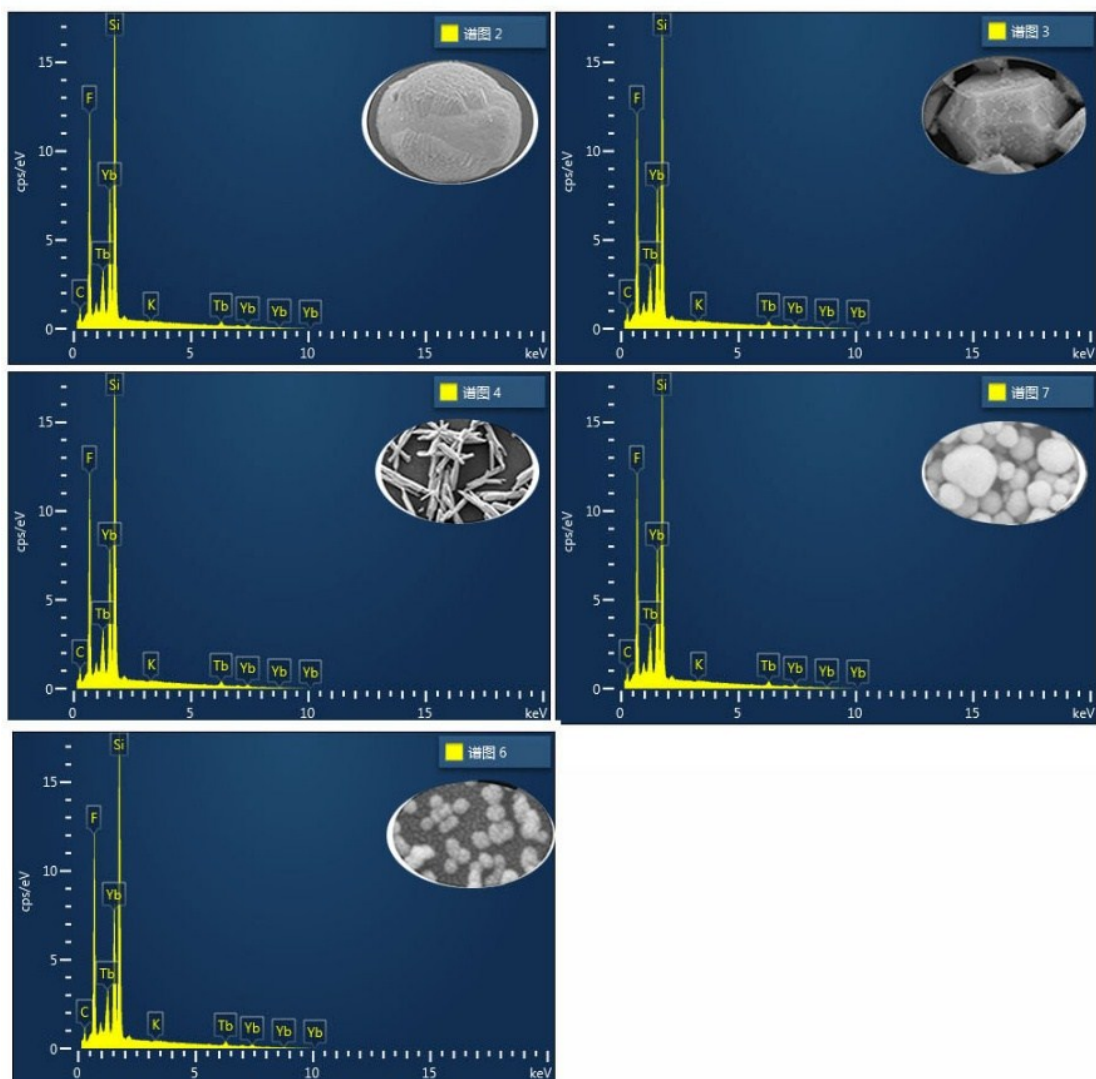

**Figure S2** EDS spectra of  $\text{KYb}_3\text{F}_{10}:\text{5\%Tb}^{3+}$  with different morphologies.

|                                               |                                                                                   |                                                                                   |                                                                                   |                                                                                     |                                                                                     |
|-----------------------------------------------|-----------------------------------------------------------------------------------|-----------------------------------------------------------------------------------|-----------------------------------------------------------------------------------|-------------------------------------------------------------------------------------|-------------------------------------------------------------------------------------|
| $\text{KYb}_3\text{F}_{10}:\text{5\%Tb}^{3+}$ | 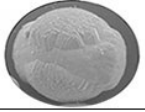 |  |  |  |  |
| Actual content of $\text{Tb}^{3+}$ (%)        | 3.54                                                                              | 3.55                                                                              | 3.54                                                                              | 3.53                                                                                | 3.52                                                                                |

Figure S3 Actual content of  $\text{Tb}^{3+}$ .

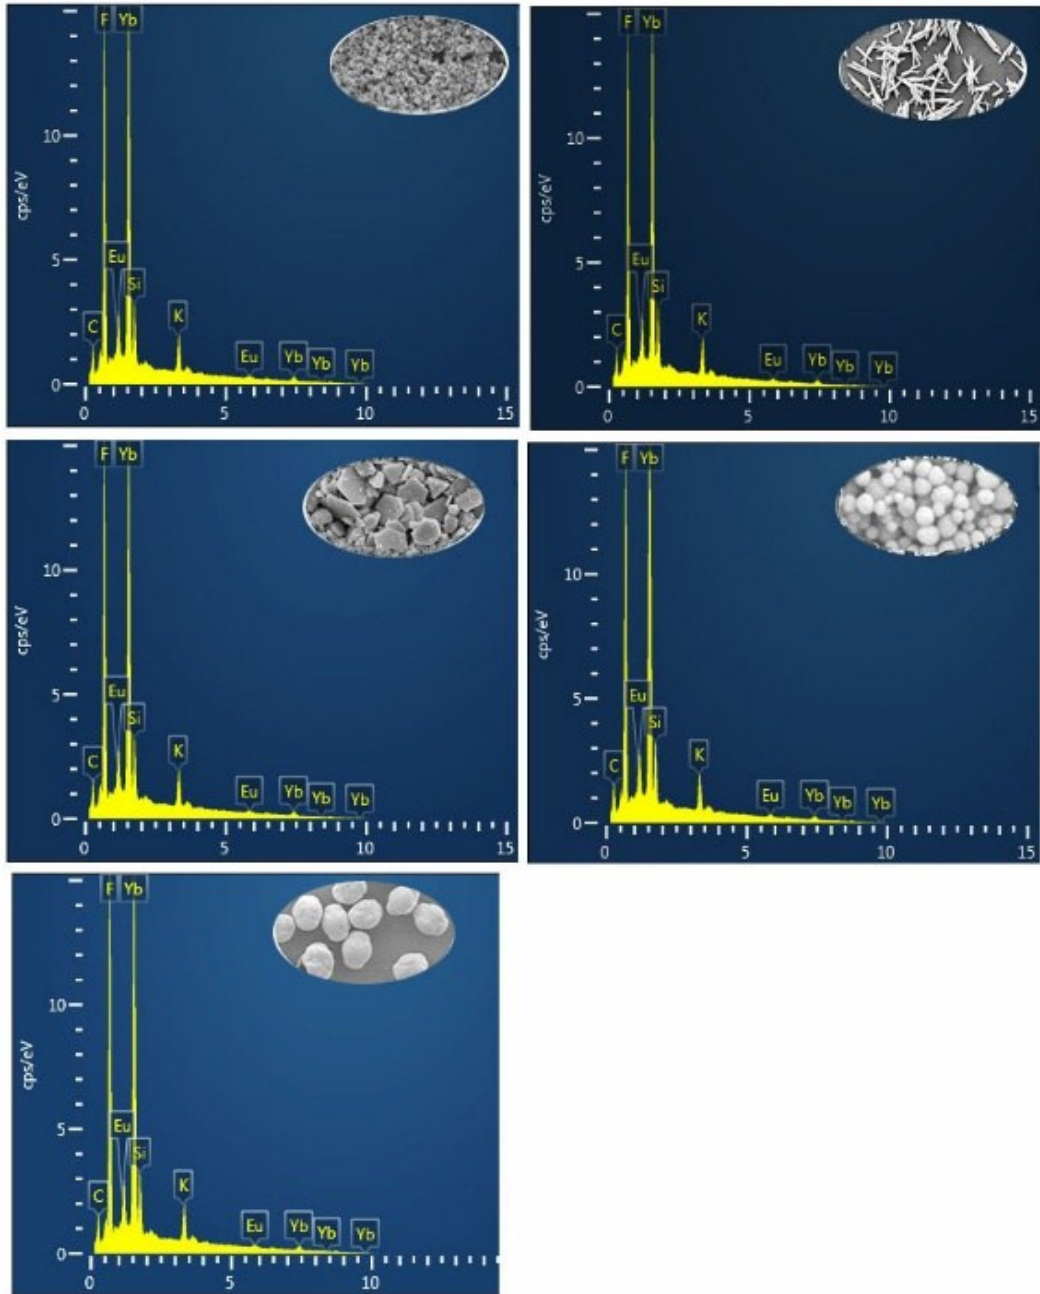

**Figure S4** EDS spectra of  $\text{KYb}_3\text{F}_{10}:5\%\text{Eu}^{3+}$  with different morphologies.

|                                                        |                                                                                   |                                                                                   |                                                                                    |                                                                                     |                                                                                     |
|--------------------------------------------------------|-----------------------------------------------------------------------------------|-----------------------------------------------------------------------------------|------------------------------------------------------------------------------------|-------------------------------------------------------------------------------------|-------------------------------------------------------------------------------------|
| <b>KYb<sub>3</sub>F<sub>10</sub>:5%Eu<sup>3+</sup></b> | 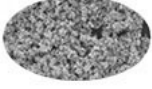 |  |  |  |  |
| <b>Actual content of Eu<sup>3+</sup>(%)</b>            | <b>3.46</b>                                                                       | <b>3.46</b>                                                                       | <b>3.46</b>                                                                        | <b>3.44</b>                                                                         | <b>3.49</b>                                                                         |

Figure S5 Actual content of Eu<sup>3+</sup>.

|                                                                                                            |                                                                                   |                                                                                   |                                                                                   |                                                                                     |                                                                                     |
|------------------------------------------------------------------------------------------------------------|-----------------------------------------------------------------------------------|-----------------------------------------------------------------------------------|-----------------------------------------------------------------------------------|-------------------------------------------------------------------------------------|-------------------------------------------------------------------------------------|
| <b>KYb<sub>3</sub>F<sub>10</sub>:5%Eu<sup>3+</sup></b>                                                     |  |  |  |  |  |
| <b>Relative ratio of <sup>5</sup>D<sub>0-7</sub>F<sub>1</sub>/<sup>5</sup>D<sub>0-7</sub>F<sub>2</sub></b> | <b>1.77</b>                                                                       | <b>1.93</b>                                                                       | <b>2.47</b>                                                                       | <b>2.71</b>                                                                         | <b>3.93</b>                                                                         |

**Figure S6** Relative intensity ratio of <sup>5</sup>D<sub>0-7</sub>F<sub>1</sub>/<sup>5</sup>D<sub>0-7</sub>F<sub>2</sub> transitions.

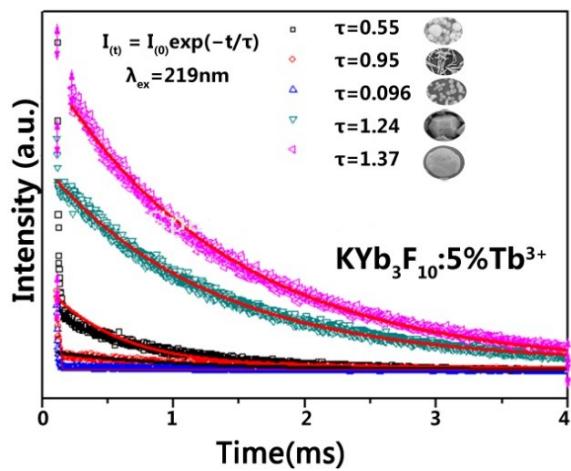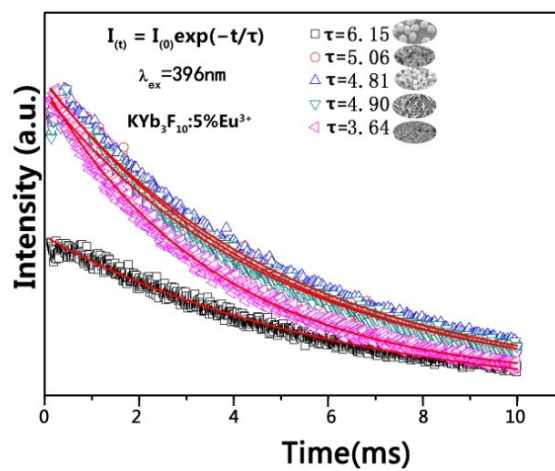

Figure S7 Photoluminescence lifetimes of Tb<sup>3+</sup> and Eu<sup>3+</sup> in different morphologies.
